# Supplementary material
Source: Royal Society of Chemistry journal article supplement (doi:10.1039/d6mh00158k)
Supplement: d6mh00158k1.pdf [file d6mh00158k1.pdf]

# Supplementary Information

## Tellurium-Free GeSbSe Thin Film for Reliable Selector-Only Memory Operation

Inchan Oh<sup>a,1</sup>, Won Hee Jeong<sup>a,1</sup>, Jaeho Jung<sup>b</sup>, Min Kyu Yang<sup>c,\*</sup>, and Gun Hwan Kim<sup>a,b,\*</sup>

<sup>a</sup> Department of System Semiconductor Engineering, Yonsei University, Seoul 03722,  
Republic of Korea

<sup>b</sup> Department of Materials Science and Engineering, Yonsei University, Seoul 03722,  
Republic of Korea

<sup>c</sup> Department of Artificial Intelligence Semiconductor Engineering, Sahmyook University,  
Seoul 01795, Republic of Korea

\* Corresponding authors.

<sup>1</sup>These authors contributed equally to this work

E-mail addresses: [dbrophi@syu.ac.kr](mailto:dbrophi@syu.ac.kr) (M. K. Yang) and [kgh@yonsei.ac.kr](mailto:kgh@yonsei.ac.kr) (G.H. Kim)

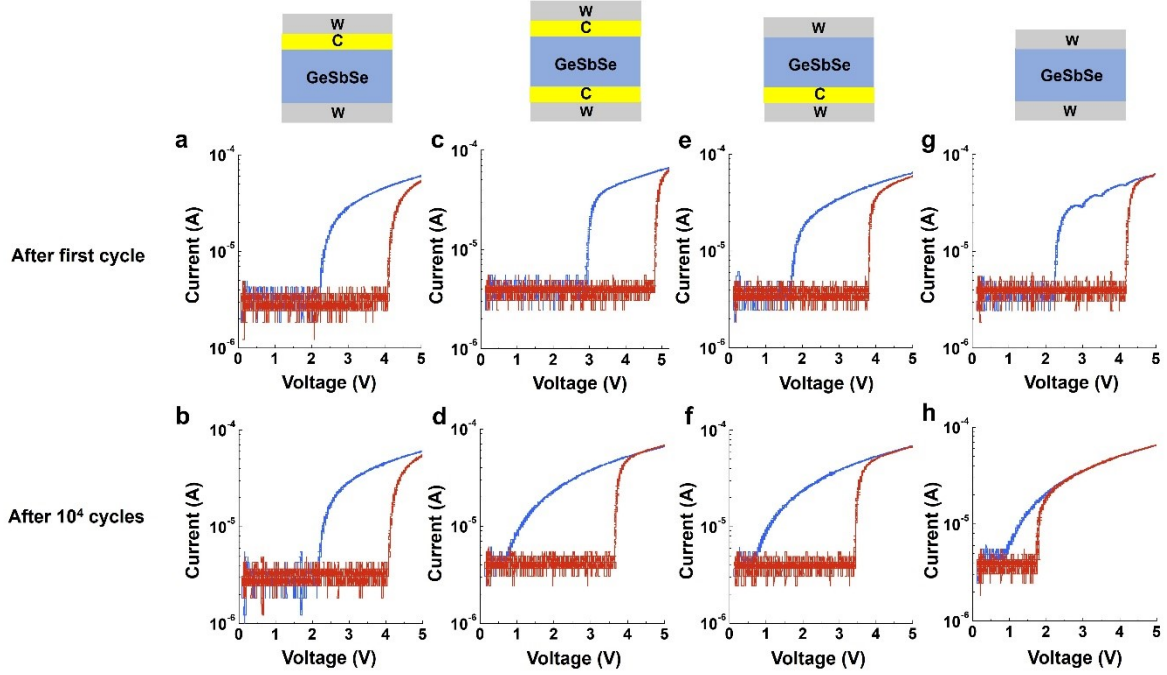

**Fig. S1** PIV measurement is operated for 4 GSS SOM devices with different carbon layer positions. 1 cycle represents the alternating positive and negative write pulses. Each PIV results show before and after  $10^4$  write pulses cycles of the device deposited C layers (a-b) only between TE and active layer, (c-d) both TE and BE sides, (e-f) only between BE and active layer, and (g-h) no C layers.

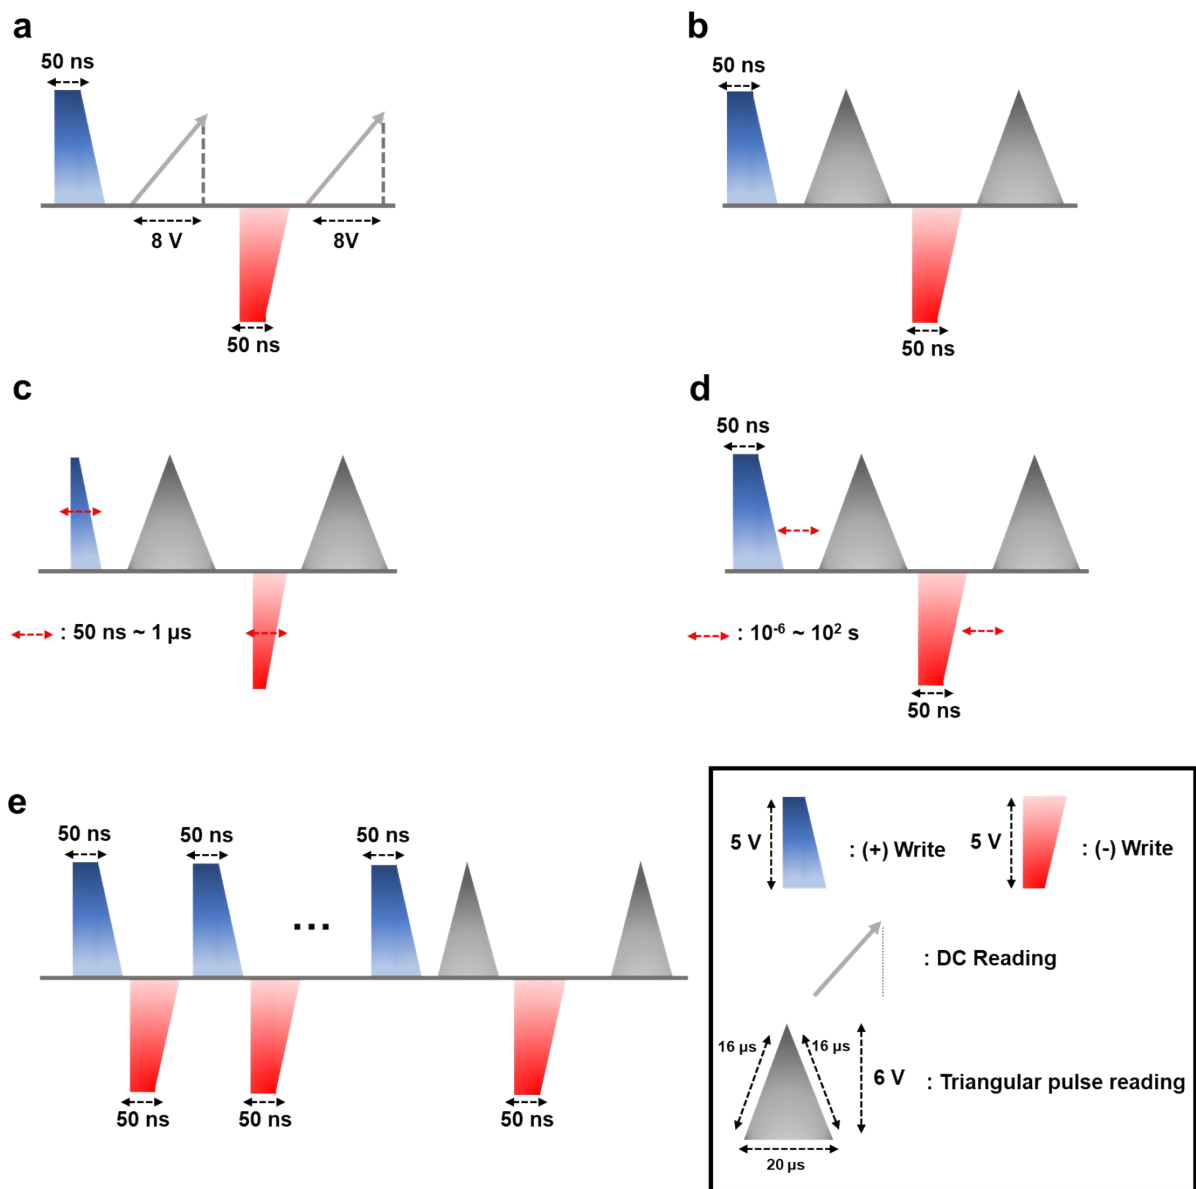

**Fig. S2** (a) Applied voltage scheme for SOM  $I-V$  measurements. For each  $V_{th}$  state, writing was programmed by pulses, while verification was operated using DC  $I-V$  measurements. (b) Schematic of PIV measurement with triangular pulse reading process. (c) PIV measurement expression for speed measurement, varying the write pulse width from 50 ns to 1  $\mu$ s. (d) PIV schematic for  $V_{th}$  drift measurement, ranging the delay time from  $10^{-6}$  to  $10^2$  s. Schematics for (e) endurance test, which several positive and negative write pulse cycles were applied.

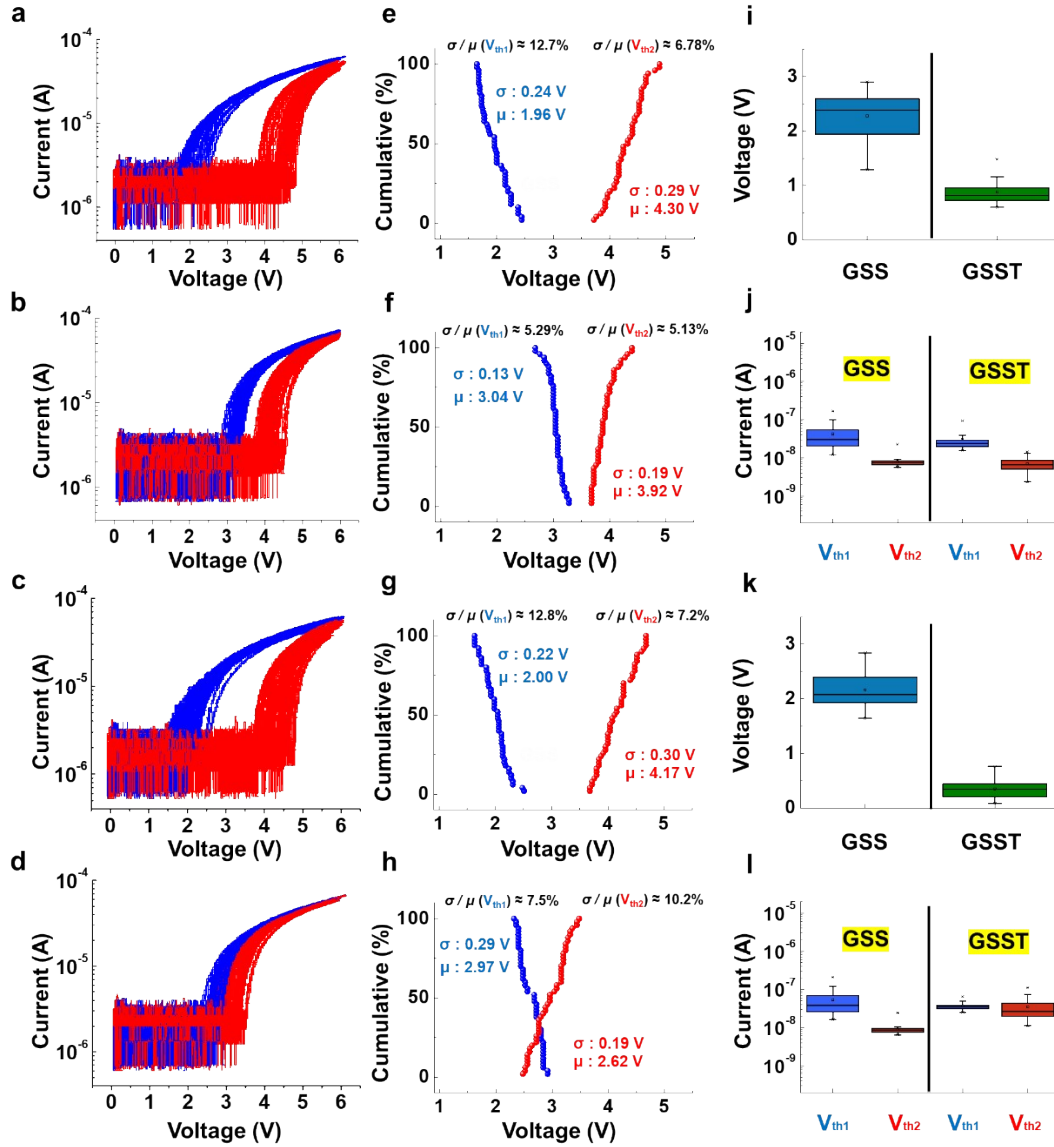

**Fig. S3** Statistical evaluation of GSS and GSST SOM devices based on 50-cycle PIV measurements. (a–d) Overlaid PIV curves from 50 cycles (5 cycles  $\times$  10 cells) for (a) fresh GSS, (b) fresh GSST, (c) GSS after  $10^5$  write pulse cycles, and (d) GSST after  $10^5$  write pulse cycles. (e–h) Coefficient of variation (CV =  $\sigma/\mu$ ,  $\sigma$  = Standard deviation,  $\mu$  = Mean value) of  $V_{th1}$  and  $V_{th2}$  for (e) fresh GSS, (f) fresh GSST, (g) cycled GSS, and (h) cycled GSST. Box plots of the read window margin (RWM) for (i) fresh and (k) cycled devices, respectively. Box plots of the off-leakage current for (j) fresh and (l) cycled devices, respectively.

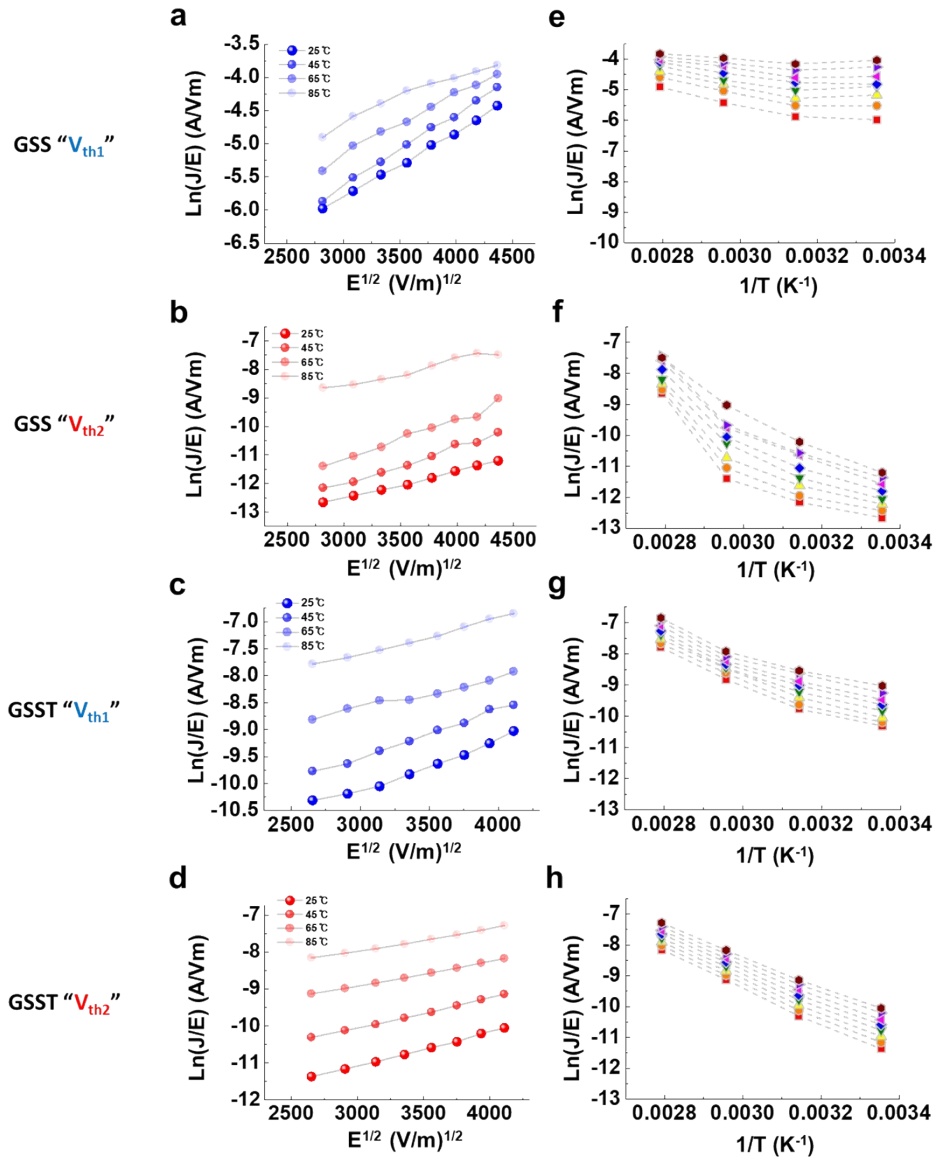

**Fig. S4** (a-d) Plots representing the relationship between  $\ln(J/E)$  and  $E^{1/2}$  and (e-h) plots representing the relationship between  $\ln(J/E)$  and  $1/T$  extracted from the 0.5-1.2 V of DC  $I$ - $V$  curves for each  $V_{th1}$  and  $V_{th2}$  states of GSS and GSST SOM devices.

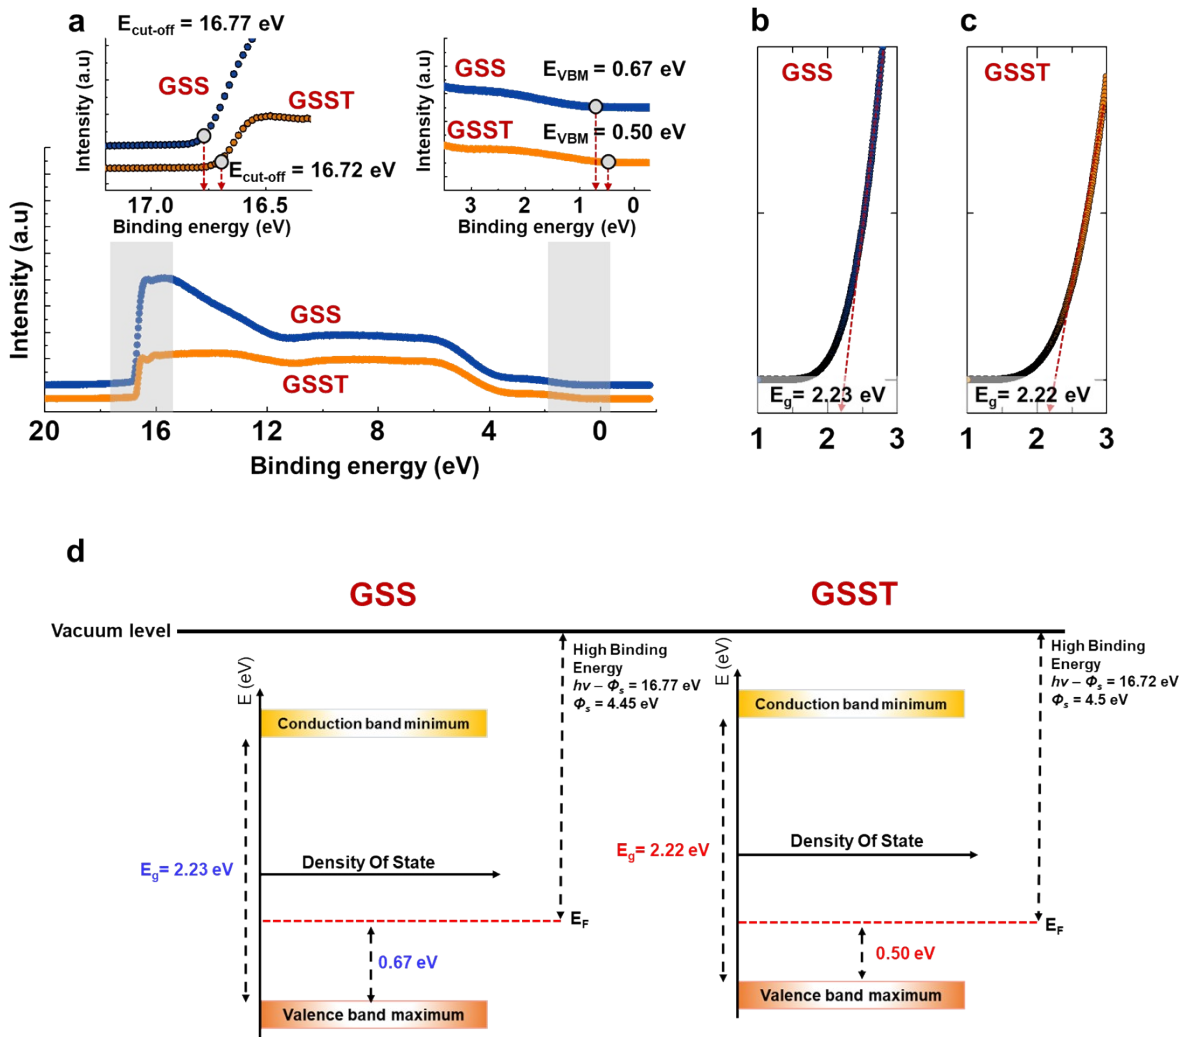

**Fig. S5** (a) UPS spectroscopy measurement results for the GSS and GSST SOM devices. The work functions ( $\Phi$ ) of these active layers are estimated by the relationship between the incident beam energy and the cut-off energy, while the valence band maximums were derived through linear fitting in the low binding energy region. Tauc plot of  $(ah\nu)^2$  versus  $h\nu$  for (b) GSS and (c) GSST. (d) The integrated energy band diagrams of GSS and GSST based on the information from UPS measurement and Tauc plot fitting.

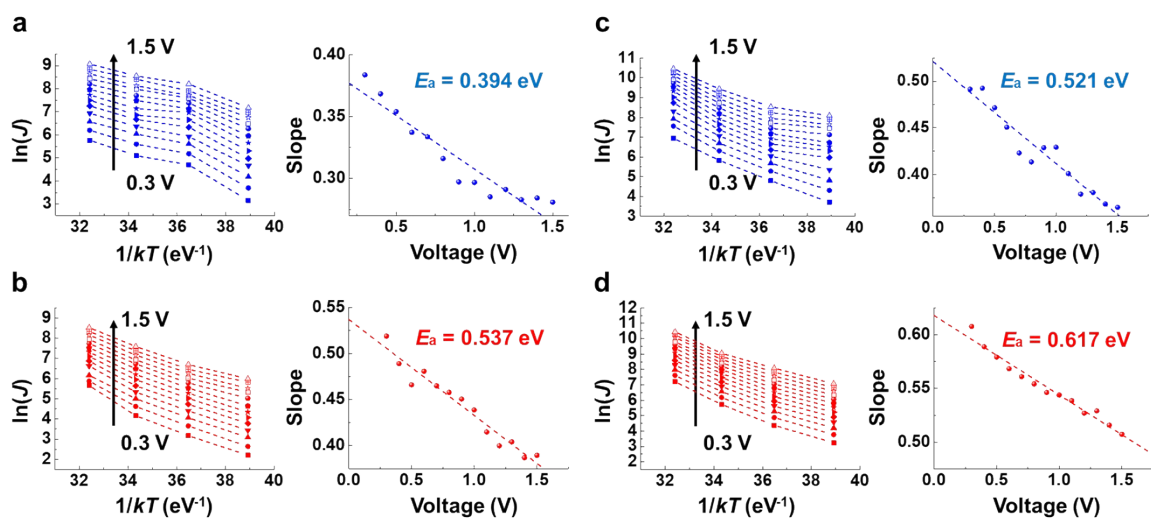

**Fig. S6** Arrhenius plots for (a) GSS  $V_{\text{th}1}$ , (b) GSS  $V_{\text{th}2}$ , (c) GSST  $V_{\text{th}1}$ , and (d) GSST  $V_{\text{th}2}$  states.

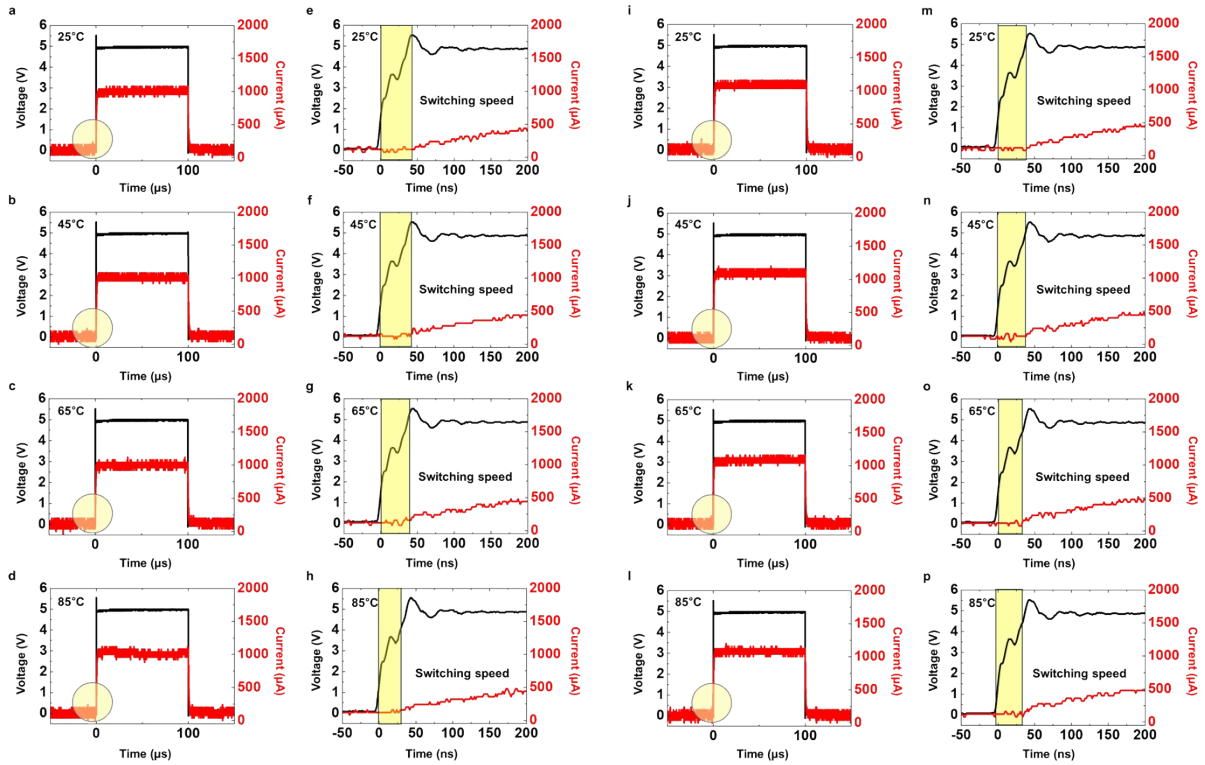

**Fig. S7** Temperature-dependent transient current responses of the SOM devices. Transient current of the (a–d) GSS and (i–l) GSST devices measured at 25, 45, 65, and 85 °C, respectively, under a +5 V pulse (pulse width 100  $\mu$ s, rise time 6 ns, fall time 6 ns), showing the occurrence of threshold switching (TS). Panels (e–h) (GSS) and (m–p) (GSST) present magnified views of the regions marked by yellow circles in (a–d) (GSS) and (i–l) (GSST), respectively, highlighting the abrupt current increase associated with the TS event. From the temperature-dependent measurements, the switching transition occurs within 50 ns for both materials at all temperatures, indicating an intrinsic switching speed below 50 ns independent of device type and temperature.

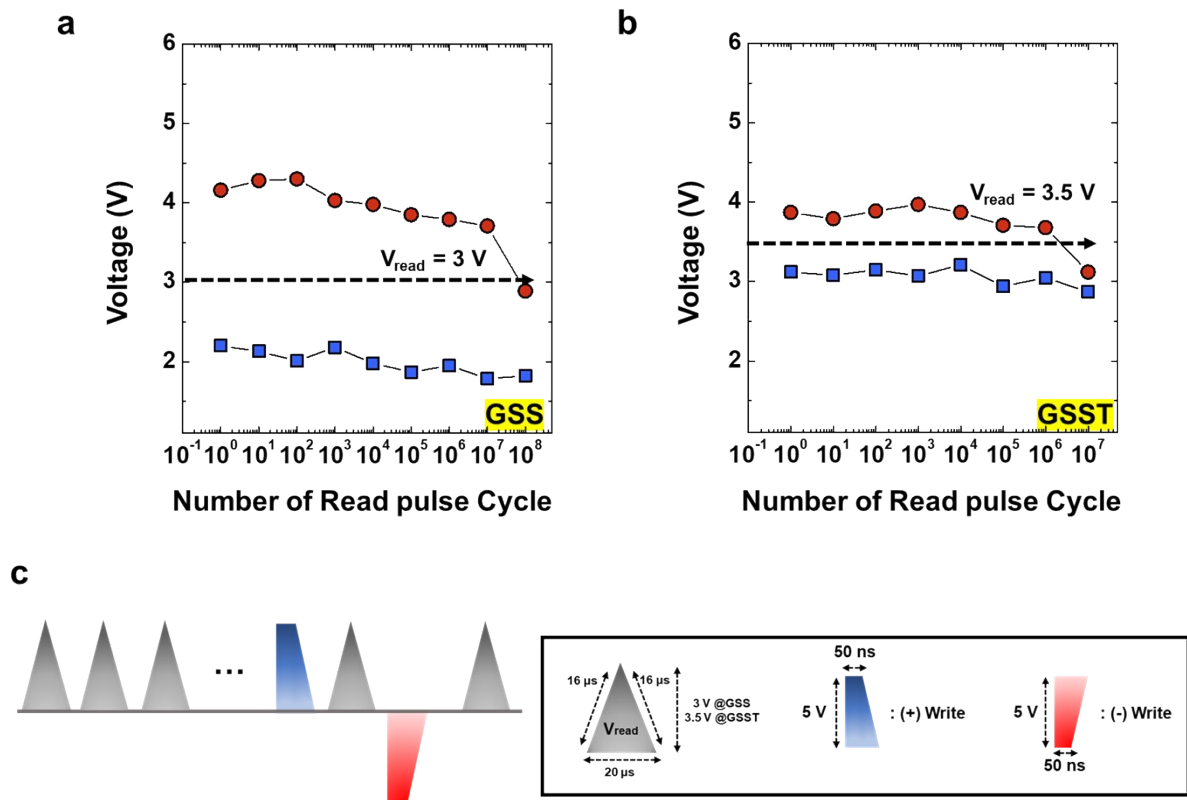

**Fig. S8** Potential read disturb behavior of (a) GSS and (b) GSST SOM devices and (c) pulse scheme for read disturb measurement. Under the repeated read pulses with the amplitude of  $V_{read}$  (GSS @  $3\text{ V}$ , GSST @  $3.5\text{ V}$ ), the devices exhibit the stable  $V_{th1}$  and  $V_{th2}$  over  $10^7$  cycles for GSS and  $10^6$  cycles for GSST.

**Table S1** Homopolar and heteropolar bonds of Ge, Sb, Se, and Te, with corresponding bond energies, bond lengths, and electronegativities.

| <b>Bonding</b> | <b>Bonding energy<br/>(kcal/mol)</b> | <b>Bonding length<br/>(Å)</b> | <b>ΔElectronegativity<br/>(Pauling)</b> |
|----------------|--------------------------------------|-------------------------------|-----------------------------------------|
| <b>Ge–Ge</b>   | 37.6 <sup>(57)</sup>                 | 2.45 ± 0.03 <sup>(56)</sup>   | 0.0                                     |
| <b>Ge–Sb</b>   | 33.7 <sup>(57)</sup>                 | 2.69 ± 0.02 <sup>(58)</sup>   | 0.04                                    |
| <b>Ge–Se</b>   | 49.1 <sup>(57)</sup>                 | 2.37 ± 0.03 <sup>(56)</sup>   | 0.54                                    |
| <b>Ge–Te</b>   | 35.5 <sup>(57)</sup>                 | 2.64 ± 0.02 <sup>(58)</sup>   | 0.09                                    |
| <b>Sb–Sb</b>   | 39.6 <sup>(59)</sup>                 | 2.44 <sup>(58)</sup>          | 0.0                                     |
| <b>Sb–Se</b>   | 43.9 <sup>(57)</sup>                 | 2.58 ~ 2.59 <sup>(62)</sup>   | 0.5                                     |
| <b>Sb–Te</b>   | 40.6 <sup>(59)</sup>                 | 2.83 ± 0.02 <sup>(58)</sup>   | 0.05                                    |
| <b>Se–Se</b>   | 44.0 <sup>(57)</sup>                 | 2.32 ± 0.03 <sup>(56)</sup>   | 0.0                                     |
| <b>Se–Te</b>   | 44.2 <sup>(57)</sup>                 | 2.57 <sup>(60)</sup>          | 0.45                                    |
| <b>Te–Te</b>   | 33.0 <sup>(57)</sup>                 | 2.76 ± 0.02 <sup>(61)</sup>   | 0.0                                     |

**Table S2** Performance comparison between our SOM and previous results.

| Device case                                    | This work  |             | Sci. Rep. 2024 <sup>(66)</sup>                            | IEDM 2023 <sup>(40)</sup> | IEEE 2025 <sup>(67)</sup> | IEDM 2023 <sup>(68)</sup> | IEEE EDL 2025 <sup>(69)</sup> |
|------------------------------------------------|------------|-------------|-----------------------------------------------------------|---------------------------|---------------------------|---------------------------|-------------------------------|
|                                                | GSS        | GSST        |                                                           |                           |                           |                           |                               |
| $V_F$ (V)                                      | ~6.5       | ~6.5        | ~8                                                        | 4.2                       | -                         | -                         | ~6                            |
| RWM (V)                                        | 2.1        | 0.8         | 1.3                                                       | 1.2                       | > 1                       | 0.5                       | ~3                            |
| $T_{\text{write}}$ (s)                         | 50 n       | 50 n        | 50 n( $V_{\text{th1}}$ ),<br>1 $\mu$ ( $V_{\text{th2}}$ ) | ~10 n                     | 10 $\mu$                  | < 56 n                    | 1 $\mu$                       |
| Write pulse amplitude (V)                      | 5          | 5           | -                                                         | 6                         | 8                         | -                         | 5                             |
| Write current ( $\mu$ A)                       | ~10        | ~10         | 393( $V_{\text{th1}}$ ),<br>100( $V_{\text{th2}}$ )       | < 100                     | -                         | 40                        | 75~300                        |
| $V_{\text{th1}}/V_{\text{th2}}$ drift (mV/dec) | 31 / 36.33 | 37.2 / 60.4 | -                                                         | 46.95 / 36.06             | 16 / 5                    | -                         | -                             |
| Retention                                      | > 2 hr     | < 2 hr      | 1 day                                                     | > 10 years                | -                         | -                         | $10^3\sim 10^5$ s             |
|                                                | @ 85 °C    | @ 85 °C     | @ 85 °C                                                   | @ RT                      | -                         | -                         | @ 85 °C                       |
| Endurance (cycles)                             | $10^6$     | $10^4$      | $10^5$                                                    | $10^8$                    | -                         | $10^8$                    | -                             |
